# Supplementary material for: Stable isotopic characterization of a coastal floodplain forest community: a case study for isotopic reconstruction of Mesozoic vertebrate assemblages
Source: R Soc Open Sci. 2019 Feb 20;6(2):181210. doi: 10.1098/rsos.181210 (PMC6408390; doi:10.1098/rsos.181210)
Supplement: Supplementary Table 2 [file rsos181210supp5.xlsx]

## Sheet: Diet - modern
Taxon	Common name	Diet	Habitat	Diet classification	Broad Guild Category	Source(s)
Alligator mississippiensis	American Alligator	invertebrates/crustaceans, fish (e.g. gar, bowfin, etc), birds, turtles, snakes, amphibians, mammals (e.g. nutria, swamp rabbits, occasional feral pigs), conspecifics	freshwater aquatic, some brackish to marine wandering, terrestrial basking	hypercarnivorous faunivore	aquatic faunivore	Gabrey, S. (2010). Demographic and geographic variation in food habits of american alligators (Alligator mississippiensis) in Louisiana. Hanson, R., Karstad, L. (1959). Feral swine in the Southeastern United States
Amia calva	Bowfin	fish, crustaceans, other aquatic invertebrates, amphibians	Freshwater aquatic	hypercarnivorous faunivore	aquatic faunivore	Ross, S. (2001). Inland Fishes of Mississippi. Mississippi: University Press of Mississippi.
Atractosteus spatula	Alligator Gar	fish, crustaceans, other aquatic invertebrates, amphibians, conspecifics	euryhaline aquatic	hypercarnivorous faunivore	aquatic faunivore	Buckmeier, D. (2008). Life History and Status of Alligator Gar Atractosteus spatula, with Recommendations for Management.
Lepisosteus sp.	Gar	fish, crustaceans, other aquatic invertebrates, amphibians, conspecifics	euryhaline aquatic, though primarily freshwater	hypercarnivorous faunivore	aquatic faunivore	Buckmeier, D. (2008). Life History and Status of Alligator Gar Atractosteus spatula, with Recommendations for Management.
Lontra canadensis	North American River Otter	fish (in summer/fall or low water), crustaceans (winter/spring or high water). Opportunistic feeding on: molluscs, amphibians, snakes, turtles, eggs, aquatic mammals (ie. muskrat)	freshwater aquatic (~33% of day spent in water)	hypercarnivorous faunivore	aquatic faunivore	Naughton, D. (2012). The Natural History of Canadian Mammals. University of Toronto Press. p.478; Lariviere and Walton. (1998) Lontra canadensis. Mammalian Species 587: p.1-8. Clementz, MT., and Koch, PL. (2001). Differentiating aquatic mammal habitat and foraging ecology with stable isotopes in tooth enamel. Oecologia 129: 461-472
Neovison vison	American Mink	rodents, muskrats, rabbits, small fish, amphibians, reptiles, crustaceans, eggs, waterfowl, insects, carrion	primarily terrestrial (some aquatic feeding), closed-to-open canopy forests, wetlands	hypercarnivorous faunivore	terrestrial faunivore	Naughton, D. (2012). The Natural History of Canadian Mammals. University of Toronto Press. p.509.
Lynx rufus	Bobcat	rodents, rabbits, juvenile deer, juvenile pigs, ground birds, reptiles, carrion	terrestrial, closed-to-open canopy forests	hypercarnivorous faunivore	terrestrial faunivore	Naughton, D. (2012). The Natural History of Canadian Mammals. University of Toronto Press. p.526.; Nowak, R. (1999). Walker's Mammals of the World, Sixth Edition. Baltimore and London: The Johns Hopkins University Press. Hanson, R., Karstad, L. (1959). Feral swine in the Southeastern United States
Canis latrans	Coyote	primarily rodents, rabbits, birds, reptiles, insects, carrion. Occasionally leaves, fruits, vegetable matter	terrestrial, closed-to-open canopy forests	meso-carnivorous faunivore	terrestrial faunivore	Naughton, D. (2012). The Natural History of Canadian Mammals. University of Toronto Press. p.526.; Nowak, R. (1999). Walker's Mammals of the World, Sixth Edition. Baltimore and London: The Johns Hopkins University Press.
Procyon lotor	Raccoon	insects, crayfish, other invertebrates (~50% diet on inverts), small mammals, amphibians, reptiles, fish eggs, berries/fruits, nuts, acorns, crops (~50% of diet on plant matter), carrion	terrestrial, closed-to-open canopy forests	animal-dominated omnivore	terrestrial omnivore	Naughton, D. (2012). The Natural History of Canadian Mammals. University of Toronto Press. p.526.; Nowak, R. (1999). Walker's Mammals of the World, Sixth Edition. Baltimore and London: The Johns Hopkins University Press.
Ursus americanus	American Black Bear	vegetation (grasses, sedges, corn), fruit (blackberry, dewberry, acorn, palmetto, etc.), mast, beetles/invertebrates, deer, rabbit, carrion	terrestrial, closed-to-open canopy forests	mixed-feeding omnivore	terrestrial omnivore	Naughton, D. (2012). The Natural History of Canadian Mammals. University of Toronto Press. p.526.; Nowak, R. (1999). Walker's Mammals of the World, Sixth Edition. Baltimore and London: The Johns Hopkins University Press. Benson, J. Chamberlain, M. (2006). Food Habits of Louisiana Black Bears (Ursus americanus luteolus) in Two Subpopulations of the Tensas River Basin
Didelphis virginiana	Virginia Opposum	insects, earthworms, slugs, other small invertebrates, fruits/berries, tubers, nuts/seeds, shoots/vegetables, small mammals, small amphibians & reptiles, eggs, etc.	terrestrial, closed-to-open canopy forests	mixed-feeding omnivore	terrestrial omnivore	Naughton, D. (2012). The Natural History of Canadian Mammals. University of Toronto Press. p.5
Dasypus novemcinctus	Nine-banded Armadillo	insects (grubs, beetles, ants, termites), earthworms, small amphibians & reptiles, eggs, carrion, fungi, tubers, seeds (plants <10% diet)	terrestrial, closed-to-open canopy forests	insect-dominated omnivore	terrestrial omnivore	Chapman, J. and Feldhamer, G. (1982) Wild Mammals of North America: Biology, Management, and Economics, Johns Hopkins University Press, ISBN 0801823536; Schmidly, D. and William, D. (2004) "Nine-banded Armadillo" in The Mammals of Texas. Austin: University of Texas Press, ISBN 0292702418.
Mephitis mephitis	Striped Skunk	insects, earthworms, molluscs (snails), crustaceans (crayfish), small mammals and amphibians, eggs, berries, nuts, fruits, grains. More faunivory/insectivory in summer, more plant matter in winter/fall	terrestrial, closed-to-open canopy forests	insect-dominated omnivore	terrestrial omnivore	Naughton, D. (2012). The Natural History of Canadian Mammals. University of Toronto Press. p.517-518
Sus scrofa	Feral Pig	vegetation, tubers, carrion, invertebrates	terrestrial, closed-to-open canopy forests	plant-dominated omnivore	terrestrial omnivore	Hanson, R., Karstad, L. (1959). Feral swine in the Southeastern United States
Sciurus niger	Eastern Fox Squirrel	primarily seeds, leaves, grains, nuts, fruit, fungus. Occasionally insects, eggs, carrion	terrestrial, closed-to-open canopy forests	herbivore (primarily granivorous)	herbivore	Nowak, R. (1999). Walker's Mammals of the World, Sixth Edition. Baltimore and London: The Johns Hopkins University Press.
Neotoma floridana	Eastern Woodrat	nuts, mast, other vegetation	terrestrial, closed-to-open canopy forests	herbivore (primarily granivorous)	herbivore	Wagle, E., Feldhamer, G. (1997). Feeding Habits of the Eastern Woodrat (Neotoma floridana) in Southern Illinois
Peromyscus gossypinus	Cotton Mouse	primarily seeds, fruits/berries, some invertebrates	terrestrial, closed-to-open canopy forests	herbivore (primarily granivorous to frugivorous)	herbivore	Nowak, R. (1999). Walker's Mammals of the World, Sixth Edition. Baltimore and London: The Johns Hopkins University Press.; Linzey, A.V. & Hammerson, G. (2008). "Peromyscus gossypinus". IUCN Red List of Threatened Species. Version 2009.2. International Union for Conservation of Nature. Retrieved 5 February 2010.
Myocastor coypus	Nutria	aquatic and terrestrial vegetation	semi-aquatic, closed-to-open canopy forests	herbivore (primarily folivorous)	herbivore	Colares et al. (2010). Feeding habits of coypu (Myocastor coypus Molina 1978) in the wetlands of the Southern region of Brazil.
Sylvilagus aquaticus	Swamp Rabbit	terrestrial (sedges, grasses, shrubs, sumac, blackberry, hickory, oak, cane stems) and aquatic (aquatic succulents, emergent aquatic plants) vegetation	terrestrial to semi-aquatic, closed-to-open canopy forests	herbivore (primarily folivorous)	herbivore	Louisiana Department of Wildlife and Fisheries (http://www.wlf.louisiana.gov/rabbit)
Odocoileus virginianus	White-tailed Deer	leaves, shoots, twigs, shrubs, fruits, acorns, mushrroms, fresh grasses (rarely)	terrestrial, closed-to-open canopy forests	herbivore (primarily folivorous)	herbivore	Naughton, D. (2012). The Natural History of Canadian Mammals. University of Toronto Press. p.563.
