# Supplementary material for: Stable isotopic characterization of a coastal floodplain forest community: a case study for isotopic reconstruction of Mesozoic vertebrate assemblages
Source: R Soc Open Sci. 2019 Feb 20;6(2):181210. doi: 10.1098/rsos.181210 (PMC6408390; doi:10.1098/rsos.181210)
Supplement: Supplementary Table 7 [file rsos181210supp10.xlsx]

## Sheet: Sheet2
Variable X for Statistical Comparison	Variable Y for Statistical Comparison	F =	F-test p-value =	t-test type	t =	t-test p-value =
δ18O AWR-135 P-Tr carbonate	δ18O AWR-135 L-Tr LPTO	1.14	0.895	t-test equal var.	-27.42	0.0001
δ18O AWR-06 P-Tr carbonate	δ18O AWR-06 L-Tr LPTO	71.31	0.15	t-test equal var.	-15.9	0.004
δ13C bone str. carb.	δ13C tooth enamel	0.76	0.42	t-test equal var.	1.67	0.099
δ13C fish bone str. carb.	δ13C fish tooth enamel	0.53	0.281	t-test equal var.	2.58	0.017
δ13C reptile bone str. carb.	δ13C reptile tooth enamel	0.75	0.792	t-test equal var.	-1.54	0.162
δ13C omni./faun. mammal bone str. carb.	δ13C omni./faun. mammal tooth enamel	0.53	0.279	t-test equal var.	1.45	0.161
δ13C herb. mammal bone str. carb.	δ13C herb. mammal tooth enamel	0.77	0.836	t-test equal var.	-0.88	0.412
δ18O bone LPTO	δ18O tooth enamel LPTO	1.6	0.301	t-test equal var.	1.92	0.062
δ18O fish bone LPTO	δ18O fish tooth enamel LPTO	0.94	0.954	t-test equal var.	0.7	0.5
δ18O reptile bone LPTO	δ18O reptile tooth enamel LPTO	1	0.997	t-test equal var.	4.42	0.002
δ18O omni./faun. mammal bone LPTO	δ18O omni./faun. mammal tooth enamel LPTO	0.83	0.809	t-test equal var.	-0.13	0.901
δ18O herb. mammal bone LPTO	δ18O herb. mammal tooth enamel LPTO	0.2	0.336	t-test equal var.	0.88	0.43
δ15N hair keratin	δ15N claw keratin	0.6	0.431	t-test equal var.	-0.43	0.67
δ15N omni./faun. mammal hair keratin	δ15N omni./faun. mammal claw keratin	0.97	0.983	t-test equal var.	-0.19	0.859
δ15N herb. mammal hair keratin	δ15N herb. mammal claw keratin	0.57	0.48	t-test equal var.	-0.83	0.423
δ13C hair keratin	δ13C claw keratin	0.96	0.941	t-test equal var.	0.11	0.911
δ13C omni./faun. mammal hair keratin	δ13C omni./faun. mammal claw keratin	0.78	0.842	t-test equal var.	0.33	0.756
δ13C herb. mammal hair keratin	δ13C herb. mammal claw keratin	0.99	0.988	t-test equal var.	-0.16	0.872
δ18O hair keratin	δ18O claw keratin	10.11	0.002	Welch t-test	1.25	0.236
δ18O omni./faun. mammal hair keratin	δ18O omni./faun. mammal claw keratin	1.82	0.636	t-test equal var.	4.13	0.006
δ18O herb. mammal hair keratin	δ18O herb. mammal claw keratin	4.44	0.128	t-test equal var.	-0.99	0.344
δ13C gar bone str. carb.	δ13C gar tooth enamel	0.81	0.77	t-test equal var.	3.2	0.005
δ13C Amia bone str. carb.	δ13C Amia tooth enamel	0.2	0.23	t-test equal var.	0.06	0.96
δ13C Atractosteus bone str. carb.	δ13C Atractosteus tooth enamel	0.42	0.422	t-test equal var.	2.86	0.02
δ13C Lepisosteus bone str. carb.	δ13C Lepisosteus tooth enamel	0.38	0.436	t-test equal var.	1.97	0.09
δ13C gar tooth enamel	δ13C gar scale ganoine	1.21	0.79	t-test equal var.	-2.18	0.045
δ13C Atractosteus tooth enamel	δ13C Atractosteus scale ganoine	1.84	0.569	t-test equal var.	-1.35	0.21
δ13C Lepisosteus tooth enamel	δ13C Lepisosteus scale ganoine	0.49	0.569	t-test equal var.	-1.63	0.15
δ13C gar bone str. carb.	δ13C gar scale ganoine	0.98	0.979	t-test equal var.	1.08	0.298
δ13C Atractosteus bone str. carb.	δ13C Atractosteus scale ganoine	0.77	0.81	t-test equal var.	1.76	0.12
δ13C Lepisosteus bone str. carb.	δ13C Lepisosteus scale ganoine	0.18	0.193	t-test equal var.	-0.35	0.74
δ18O gar tooth enamel LPTO	δ18O gar scale ganoine LPTO	0.29	0.009	t-test equal var.	-2.88	0.01
δ18O Atractosteus tooth enamel LPTO	δ18O Atractosteus scale ganoine LPTO	0.31	0.279	t-test equal var.	-1.15	0.29
δ18O Lepisosteus tooth enamel LPTO	δ18O Lepisosteus scale ganoine LPTO	0.21	0.232	t-test equal var.	-3.15	0.02
δ13C Alligator bioapatite	δ13C Alligator keratin	2.32	0.963	t-test equal var.	7.66	8.89e-08
δ18O Alligator bioapatite	δ18O Alligator keratin	75.54	0.181	t-test equal var.	5.09	3.78e-05
δ13C Didelphis bioapatite	δ13C Didelphis keratin	2.46	0.087	t-test equal var.	11.96	6.43e-14
δ18O Didelphis bioapatite	δ18O Didelphis keratin	0.54	0.2	t-test equal var.	3.74	0.0007
δ13C Sylvilagus bioapatite	δ13C Sylvilagus keratin	0.59	0.403	t-test equal var.	6.62	2.46e-06
δ18O Sylvilagus bioapatite	δ18O Sylvilagus keratin	43.85	4.21e-05	Welch t-test	6.62	1.75e-05
NOTE: herb. = herbivorous, omni. = omnivorous, faun. = faunivorous. See Supplementary Table 2 for additional dietary / natural history information
